# Supplementary material for: Association and comparison of periodontal and oral hygiene status with serum HbA1c levels: a cross-sectional study
Source: Springer Nature journal article supplement (doi:10.1186/s12903-023-03042-7), 2023-07-02
Supplement: MOESM1 [file 25566208]

**COMPARISON OF PERIODONTAL AND ORAL HYGIENE STATUS OF NON-DIABETICS AND TYPE-II DIABETICS:  
A CROSS-SECTIONAL STUDY IN KHYBER PAKHTUNKHWA, PAKISTAN**

*Supporting data\_S1*

**Annexure I: Demographic, Oral Health/Diabetes related questionnaire (modified from WHO oral health survey)**

Date:     /     /

- |                                                            |                                    |
|------------------------------------------------------------|------------------------------------|
| 1. Name:                                                   | 4. Age:                            |
| 2. Gender:                                                 | 5. Education:                      |
| 3. OPD/Reg no:                                             | 6. Occupation                      |
| 7. Income: _____ PKR/month                                 |                                    |
| 8. Diabetic/non-diabetic:                                  |                                    |
| 9. How often do you clean your teeth?                      |                                    |
| 10. What do you use to clean your teeth?                   |                                    |
| 11. How long is it since you last visit a dentist?         |                                    |
| 12. What was the reason of your last visit to the dentist? |                                    |
| 13. What tobacco product do you use?                       |                                    |
| 14. How often do you use that tobacco product?             |                                    |
| 15. Duration of diabetes                                   |                                    |
| ≤5 years                                                   |                                    |
| 6-9 years                                                  |                                    |
| ≥10 years                                                  |                                    |
| 16. HbA1c % (A/B/C)                                        | 18. T2D Complications              |
| A. ≤5.7                                                    | A. Yes   B. No                     |
| B. 6 – 6.9                                                 | 19. Any other medication use/d?    |
| C. ≥7                                                      | A. Yes   B. No                     |
| 17. Diabetes (T2D) medication.                             | 20. Any other treatment undergone? |
| A. Oral only   B. Insulin inj.                             | A. Yes   B. No                     |
| C. Combination                                             |                                    |

## RECORDING CHARTS (WHO):

### 1. COMMUNITY PERIODONTAL INDEX (CPI)

Adapted from WHO/FDI in 1982

#### a. Community Periodontal Index (CPI):

|       |    |       |
|-------|----|-------|
| 17/16 | 11 | 26/27 |
|       |    |       |
|       |    |       |
| 47/46 | 31 | 36/37 |

| Score | Criteria                                                           |
|-------|--------------------------------------------------------------------|
| 0     | Healthy                                                            |
| 1     | Bleeding observed                                                  |
| 2     | Calculus detected                                                  |
| 3     | Pocket 4-5 mm (gingival margin within the black band of the probe) |
| 4     | Pocket ≥ 6mm (black band not visible)                              |
| X     | Excluded sextant (< 2 teeth present)                               |
| 9     | Tooth not present                                                  |

#### b. Loss of Attachment (Clinical attachment loss):

|       |    |       |
|-------|----|-------|
| 17/16 | 11 | 26/27 |
|       |    |       |
|       |    |       |
| 47/46 | 31 | 36/37 |

| Score | Criteria                                                      |
|-------|---------------------------------------------------------------|
| 0     | Loss of attachment 0-3mm (CEJ not visible)                    |
| 1     | Loss of attachment 4-5mm (CEJ within the black band)          |
| 2     | Loss of attachment 6-8mm (CEJ between 5. mm and 8.5mm ring)   |
| 3     | Loss of attachment 9-11mm (CEJ between 8.5mm and 11.5mm ring) |
| 4     | Loss of attachment ≥12mm (CEJ beyond 11mm ring)               |
| X     | Excluded sextant (<2 teeth present)                           |
| 9     | Not present                                                   |

Number of missing teeth (except 3<sup>rd</sup> molar):

\_\_\_\_\_

## 2. ORAL HYGIENE INDEX-SIMPLIFIED (OHI-S):

Described by John C. Greene and Jack R. Vermillion in 1964

Comprises of Debris Index–Simplified (DI-S) and Calculus Index–Simplified (CI-S)

| Tooth | DI-S | CI-S |
|-------|------|------|
| 16    |      |      |
| 11    |      |      |
| 26    |      |      |
| 36    |      |      |
| 31    |      |      |
| 46    |      |      |
| Total |      |      |
| Score |      |      |
| OHI-S |      |      |

$$\text{OHI-S} = \text{DI-S} + \text{CI-S}$$

Interpretation:

| Score | Criteria                                                                                        |
|-------|-------------------------------------------------------------------------------------------------|
| 0     | No debris/plaque or stains present                                                              |
| 1     | Plaque covering $\leq 1/3$ of tooth surface or presence of stains regardless of plaque presence |
| 2     | Plaque covering $> 1/3$ and $< 2/3$ of the tooth surface                                        |
| 3     | Plaque covering $> 2/3$ of the tooth surface                                                    |

| Score | Criteria                                                                                                                                                                       |
|-------|--------------------------------------------------------------------------------------------------------------------------------------------------------------------------------|
| 0     | No calculus presents                                                                                                                                                           |
| 1     | Supragingival calculus covering $\leq 1/3$ of tooth surface                                                                                                                    |
| 2     | Supragingival calculus covering $> 1/3$ and $< 2/3$ of the tooth surface and/or presence of individual flecks of subgingival calculus around the cervical portion of the tooth |
| 3     | Supragingival calculus covering $> 2/3$ of the tooth surface and/or continuous heavy band of subgingival calculus around the cervical portion of the tooth                     |

*Interpretation*

**An OHI-S is scored as follows:**

- 0.0–1.2 = Good oral hygiene
- 1.3–3.0 = Fair oral hygiene
- 3.1–6.0 = Poor oral hygiene
